# Supplementary material for: Molecular heterometallic clusters [Re6−xMoxS8L6] (x = 2–3, L = py, etpy, tbp): negligible influence of the x value on the crystal structures
Source: Royal Society of Chemistry journal article supplement (doi:10.1039/d3ce01229h), 2024-01-01
Supplement: d3ce01229h1.pdf [file d3ce01229h1.pdf]

## Electronic Supplementary Information

for **Molecular heterometallic clusters**  $[\text{Re}_{6-x}\text{Mo}_x\text{S}_8\text{L}_6]$  ( $x=2-3$ ,  $L = \text{py}, \text{etpy}, \text{tbp}$ ):  
**negligible influence of the x value on the crystal structures**

Tatiana I. Lappi<sup>a</sup>, Yakov M. Gaifulin<sup>a</sup>, Taisiya S. Sukhikh<sup>a</sup>, Viktoria K. Gaifulina<sup>a</sup>, Vadim V.  
Yanshole<sup>b</sup>, Stephane Cordier<sup>c</sup>, Nikolay G. Naumov<sup>a</sup>

<sup>a</sup> Nikolaev Institute of Inorganic Chemistry SB RAS, 630090, 3, Acad. Lavrentiev ave.,  
Novosibirsk, Russia

<sup>b</sup> International Tomography Center SB RAS, 630090, 3A, Institutskaya str., Novosibirsk,  
Russia

<sup>c</sup> Univ Rennes I, CNRS, ISCR (Institut des Sciences Chimiques de Rennes) UMR 6226, F-  
35000, France

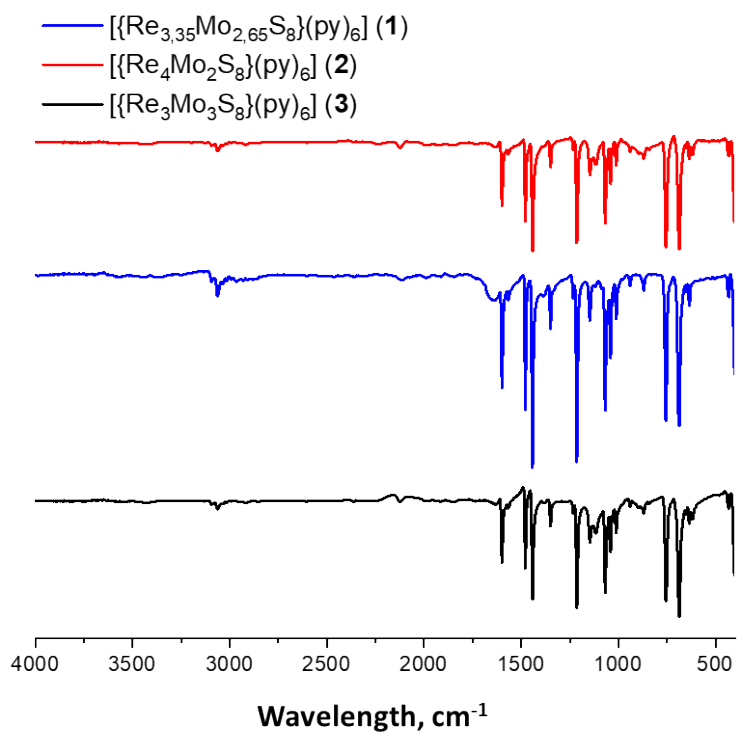

**Figure S1.** IR spectra for compounds 1-3.

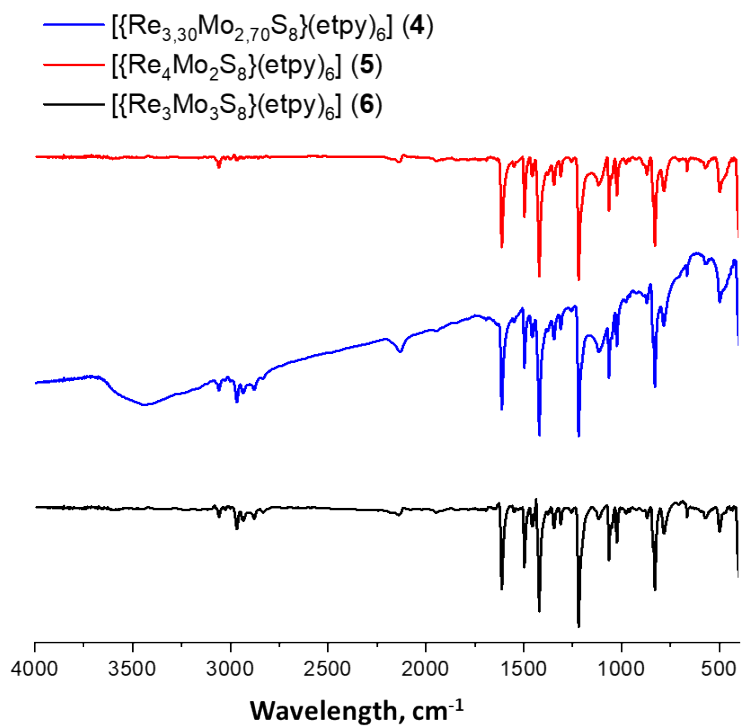

**Figure S2.** IR spectra for compounds (4-6).

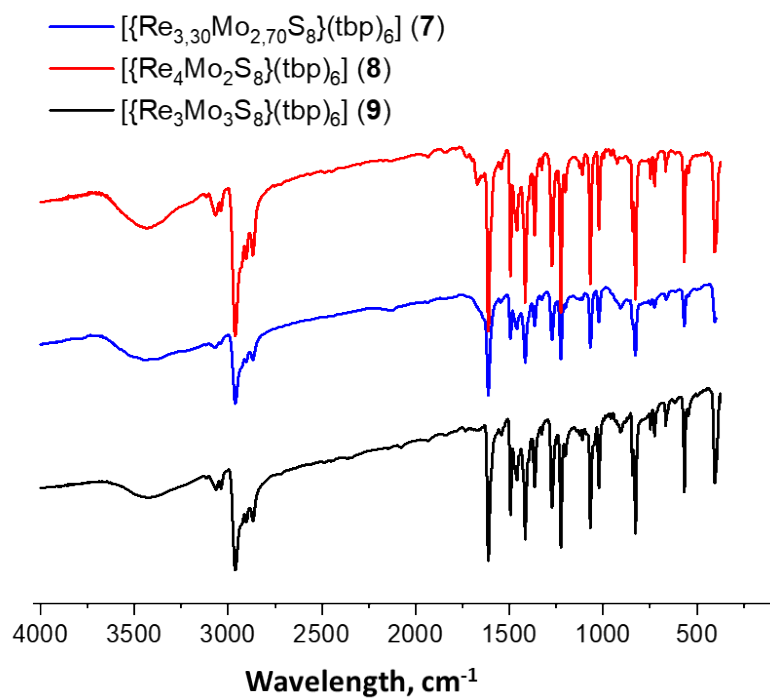

**Figure S3.** IR spectra for compounds (7-9).

**Table S1.** Crystallographic data and details of the structure refinements for the compounds **1–3**.

|                                                                             | <b>1</b>                                                                                            | <b>2</b>                                                                                      | <b>3</b>                                                                                      |
|-----------------------------------------------------------------------------|-----------------------------------------------------------------------------------------------------|-----------------------------------------------------------------------------------------------|-----------------------------------------------------------------------------------------------|
| Chemical formula                                                            | C <sub>30</sub> H <sub>30</sub> N <sub>6</sub> Re <sub>3.35</sub> Mo <sub>2.65</sub> S <sub>8</sub> | C <sub>30</sub> H <sub>30</sub> N <sub>6</sub> Re <sub>4</sub> Mo <sub>2</sub> S <sub>8</sub> | C <sub>30</sub> H <sub>30</sub> N <sub>6</sub> Re <sub>3</sub> Mo <sub>3</sub> S <sub>8</sub> |
| Molecular weight, g/mol                                                     | 1609.09                                                                                             | 1667.76                                                                                       | 1577.50                                                                                       |
| Space group                                                                 | <i>P</i> $\bar{1}$                                                                                  | <i>P</i> $\bar{1}$                                                                            | <i>P</i> $\bar{1}$                                                                            |
| <i>a</i> , Å                                                                | 9.3458(4)                                                                                           | 9.3333(2)                                                                                     | 9.3362(8)                                                                                     |
| <i>b</i> , Å                                                                | 10.5903(4)                                                                                          | 10.5520(2)                                                                                    | 10.5758(8)                                                                                    |
| <i>c</i> , Å                                                                | 11.8441(5)                                                                                          | 11.8701(2)                                                                                    | 11.8771(9)                                                                                    |
| $\alpha$ , °                                                                | 114.4320(10)                                                                                        | 114.4530(10)                                                                                  | 114.524(2)                                                                                    |
| $\beta$ , °                                                                 | 90.7490(10)                                                                                         | 91.1010(10)                                                                                   | 91.007(3)                                                                                     |
| $\gamma$ , °                                                                | 109.1920(10)                                                                                        | 108.9960(10)                                                                                  | 109.100(3)                                                                                    |
| <i>V</i> , Å <sup>3</sup>                                                   | 992.72(7)                                                                                           | 989.99(3)                                                                                     | 992.01(14)                                                                                    |
| <i>Z</i>                                                                    | 1                                                                                                   | 1                                                                                             | 1                                                                                             |
| $\rho_{\text{calcd.}}$ , g·cm <sup>-3</sup>                                 | 2.692                                                                                               | 2.797                                                                                         | 2.641                                                                                         |
| $\mu$ , mm <sup>-1</sup>                                                    | 11.436                                                                                              | 13.246                                                                                        | 10.488                                                                                        |
| $\theta$ range, °                                                           | 2.23 – 26.39                                                                                        | 2.28 – 30.49                                                                                  | 2.60 – 29.55                                                                                  |
| Miller indices range                                                        | -11 ≤ <i>h</i> ≤ 9<br>-12 ≤ <i>k</i> ≤ 13<br>-14 ≤ <i>l</i> ≤ 14                                    | -12 ≤ <i>h</i> ≤ 13<br>-15 ≤ <i>k</i> ≤ 15<br>-16 ≤ <i>l</i> ≤ 16                             | -12 ≤ <i>h</i> ≤ 12<br>-14 ≤ <i>k</i> ≤ 14<br>-16 ≤ <i>l</i> ≤ 14                             |
| Reflections collected/unique                                                | 10546/4061                                                                                          | 15877/5997                                                                                    | 15390/5504                                                                                    |
| Reflections ( <i>I</i> >2σ( <i>I</i> ))                                     | 3615                                                                                                | 5315                                                                                          | 5133                                                                                          |
| <i>R</i> <sub>int</sub>                                                     | 0.0218                                                                                              | 0.0297                                                                                        | 0.0273                                                                                        |
| GoF                                                                         | 1.044                                                                                               | 1.023                                                                                         | 1.059                                                                                         |
| <i>R</i> <sub>1</sub> / <i>wR</i> <sub>2</sub> ( <i>I</i> > 2σ( <i>I</i> )) | <i>R</i> <sub>1</sub> = 0.0195<br><i>wR</i> <sub>2</sub> = 0.0402                                   | <i>R</i> <sub>1</sub> = 0.0274<br><i>wR</i> <sub>2</sub> = 0.0493                             | <i>R</i> <sub>1</sub> = 0.0217<br><i>wR</i> <sub>2</sub> = 0.0479                             |
| <i>R</i> <sub>1</sub> / <i>wR</i> <sub>1</sub> (all data)                   | <i>R</i> <sub>1</sub> = 0.0240<br><i>wR</i> <sub>2</sub> = 0.0418                                   | <i>R</i> <sub>1</sub> = 0.0324<br><i>wR</i> <sub>2</sub> = 0.0515                             | <i>R</i> <sub>1</sub> = 0.0239<br><i>wR</i> <sub>2</sub> = 0.0488                             |
| $\Delta\rho_{\text{max}}/\Delta\rho_{\text{min}}$ (e·Å <sup>3</sup> )       | 0.842/-0.655                                                                                        | 1.077/-1.110                                                                                  | 1.115/-1.063                                                                                  |

**Table S2.** Crystallographic data and details of the structure refinements for the compounds **4–6**.

|                                                                             | <b>4</b>                                                                                          | <b>5</b>                                                                                      | <b>6</b>                                                                                      |
|-----------------------------------------------------------------------------|---------------------------------------------------------------------------------------------------|-----------------------------------------------------------------------------------------------|-----------------------------------------------------------------------------------------------|
| Chemical formula                                                            | C <sub>42</sub> H <sub>54</sub> N <sub>6</sub> Re <sub>3.3</sub> Mo <sub>2.7</sub> S <sub>8</sub> | C <sub>42</sub> H <sub>54</sub> N <sub>6</sub> Re <sub>4</sub> Mo <sub>2</sub> S <sub>8</sub> | C <sub>42</sub> H <sub>54</sub> N <sub>6</sub> Re <sub>3</sub> Mo <sub>3</sub> S <sub>8</sub> |
| Molecular weight, g/mol                                                     | 1772.89                                                                                           | 1836.07                                                                                       | 1745.81                                                                                       |
| Space group                                                                 | <i>I</i> 4 <sub>1</sub> / <i>a</i>                                                                | <i>I</i> 4 <sub>1</sub> / <i>a</i>                                                            | <i>I</i> 4 <sub>1</sub> / <i>a</i>                                                            |
| <i>a</i> , Å                                                                | 14.2868(2)                                                                                        | 14.2615(4)                                                                                    | 14.2677(11)                                                                                   |
| <i>b</i> , Å                                                                | 14.2868(2)                                                                                        | 14.2615(4)                                                                                    | 14.2677(11)                                                                                   |
| <i>c</i> , Å                                                                | 24.4236(8)                                                                                        | 24.4091(10)                                                                                   | 24.4726(4)                                                                                    |
| <i>α</i> , °                                                                | 90                                                                                                | 90                                                                                            | 90                                                                                            |
| <i>β</i> , °                                                                | 90                                                                                                | 90                                                                                            | 90                                                                                            |
| <i>γ</i> , °                                                                | 90                                                                                                | 90                                                                                            | 90                                                                                            |
| <i>V</i> , Å <sup>3</sup>                                                   | 4985.2(2)                                                                                         | 4964.6(3)                                                                                     | 4981.8(10)                                                                                    |
| <i>Z</i>                                                                    | 4                                                                                                 | 4                                                                                             | 4                                                                                             |
| $\rho_{\text{calcd.}}$ , g·cm <sup>-3</sup>                                 | 2.362                                                                                             | 2.456                                                                                         | 2.328                                                                                         |
| $\mu$ , mm <sup>-1</sup>                                                    | 9.012                                                                                             | 10.578                                                                                        | 8.366                                                                                         |
| $\theta$ range, °                                                           | 2.62 – 28.68                                                                                      | 2.62 – 31.42                                                                                  | 2.62 – 29.50                                                                                  |
| Miller indices range                                                        | -8 ≤ <i>h</i> ≤ 19<br>-18 ≤ <i>k</i> ≤ 7<br>-30 ≤ <i>l</i> ≤ 20                                   | -20 ≤ <i>h</i> ≤ 20<br>-20 ≤ <i>k</i> ≤ 20<br>-35 ≤ <i>l</i> ≤ 35                             | -19 ≤ <i>h</i> ≤ 19<br>-19 ≤ <i>k</i> ≤ 18<br>-22 ≤ <i>l</i> ≤ 33                             |
| Reflections collected/unique                                                | 6112/3043                                                                                         | 120331/4144                                                                                   | 16324/3483                                                                                    |
| Reflections ( <i>I</i> > 2σ( <i>I</i> ))                                    | 2304                                                                                              | 2933                                                                                          | 2378                                                                                          |
| <i>R</i> <sub>int</sub>                                                     | 0.017                                                                                             | 0.0757                                                                                        | 0.0445                                                                                        |
| GoF                                                                         | 1.060                                                                                             | 1.055                                                                                         | 1.033                                                                                         |
| <i>R</i> <sub>1</sub> / <i>wR</i> <sub>2</sub> ( <i>I</i> > 2σ( <i>I</i> )) | <i>R</i> <sub>1</sub> = 0.0189<br><i>wR</i> <sub>2</sub> = 0.0363                                 | <i>R</i> <sub>1</sub> = 0.0218<br><i>wR</i> <sub>2</sub> = 0.0400                             | <i>R</i> <sub>1</sub> = 0.0245<br><i>wR</i> <sub>2</sub> = 0.0456                             |
| <i>R</i> <sub>1</sub> / <i>wR</i> <sub>1</sub> (all data)                   | <i>R</i> <sub>1</sub> = 0.0301<br><i>wR</i> <sub>2</sub> = 0.0390                                 | <i>R</i> <sub>1</sub> = 0.0414<br><i>wR</i> <sub>2</sub> = 0.0445                             | <i>R</i> <sub>1</sub> = 0.0417<br><i>wR</i> <sub>2</sub> = 0.0516                             |
| $\Delta\rho_{\text{max}}/\Delta\rho_{\text{min}}$ (e·Å <sup>3</sup> )       | 0.735/-0.635                                                                                      | 0.968/-1.603                                                                                  | 0.529/-0.522                                                                                  |

**Table S3.** Crystallographic data and details of the structure refinements for the compounds 7–9.

|                                                                       | <b>7</b>                                     | <b>8</b>                                     | <b>9</b>                                     |
|-----------------------------------------------------------------------|----------------------------------------------|----------------------------------------------|----------------------------------------------|
| Chemical formula                                                      | $C_{54}H_{78}N_6Re_{3.30}Mo_{2.70}S_8$       | $C_{59.188}H_{85.782}N_{8.594}Re_4Mo_2S_8$   | $C_{59.168}H_{85.752}N_{8.584}Re_3Mo_3S_8$   |
| Molecular weight, g/mol                                               | 1941.20                                      | 2110.91                                      | 2020.18                                      |
| Space group                                                           | $P4_2/n$                                     | $P\bar{1}$                                   | $P\bar{1}$                                   |
| $a$ , Å                                                               | 26.7541(6)                                   | 14.3716(4)                                   | 14.3459(11)                                  |
| $b$ , Å                                                               | 26.7541(6)                                   | 15.5898(4)                                   | 15.5318(13)                                  |
| $c$ , Å                                                               | 9.3946(3)                                    | 18.3061(5)                                   | 18.3357(14)                                  |
| $\alpha$ , °                                                          | 90                                           | 105.3240(10)                                 | 105.271(3)                                   |
| $\beta$ , °                                                           | 90                                           | 104.1010(10)                                 | 103.906(3)                                   |
| $\gamma$ , °                                                          | 90                                           | 100.1840(10)                                 | 100.383(3)                                   |
| $V$ , Å <sup>3</sup>                                                  | 6724.5(4)                                    | 3706.73(17)                                  | 3694.1(5)                                    |
| $Z$                                                                   | 4                                            | 2                                            | 2                                            |
| $\rho_{\text{calcd.}}$ , g·cm <sup>-3</sup>                           | 1.917                                        | 1.891                                        | 1.816                                        |
| $\mu$ , mm <sup>-1</sup>                                              | 6.690                                        | 7.098                                        | 5.655                                        |
| $\theta$ range, °                                                     | 2.42 – 25.64                                 | 2.42 – 30.58                                 | 2.32 – 29.56                                 |
| Miller indices range                                                  | -32 ≤ h ≤ 32<br>-32 ≤ k ≤ 31<br>-11 ≤ l ≤ 11 | -19 ≤ h ≤ 17<br>-20 ≤ k ≤ 21<br>-24 ≤ l ≤ 24 | -19 ≤ h ≤ 19<br>-19 ≤ k ≤ 21<br>-25 ≤ l ≤ 25 |
| Reflections collected/unique                                          | 54716/6401                                   | 64715/18377                                  | 61226/20697                                  |
| Reflections ( $I > 2\sigma(I)$ )                                      | 5616                                         | 16088                                        | 14973                                        |
| $R_{\text{int}}$                                                      | 0.061                                        | 0.037                                        | 0.054                                        |
| GoF                                                                   | 1.161                                        | 1.027                                        | 1.045                                        |
| $R_1 / wR_2(I > 2\sigma(I))$                                          | $R_1 = 0.0369$<br>$wR_2 = 0.0660$            | $R_1 = 0.0272$<br>$wR_2 = 0.0580$            | $R_1 = 0.0408$<br>$wR_2 = 0.0825$            |
| $R_1 / wR_1$ (all data)                                               | $R_1 = 0.0473$<br>$wR_2 = 0.0691$            | $R_1 = 0.0339$<br>$wR_2 = 0.0272$            | $R_1 = 0.0650$<br>$wR_2 = 0.0939$            |
| $\Delta\rho_{\text{max}}/\Delta\rho_{\text{min}}$ (e·Å <sup>3</sup> ) | 1.195/-1.120                                 | 1.553/-1.415                                 | 1.144/-0.971                                 |

**Table S4.** Occupancy of metal atom crystallographic positions in the structures 1–9.

|                                  | $[\{\text{Re}_{3.35}\text{Mo}_{2.65}\text{S}_8\}(\text{py})_6]$<br>(1)   | $[\{\text{Re}_4\text{Mo}_2\text{S}_8\}(\text{py})_6]$<br>(2)                                     | $[\{\text{Re}_3\text{Mo}_3\text{S}_8\}(\text{py})_6]$<br>(3)                                     |
|----------------------------------|--------------------------------------------------------------------------|--------------------------------------------------------------------------------------------------|--------------------------------------------------------------------------------------------------|
| Re <sup>1</sup> /Mo <sup>1</sup> | 0.61/0.39                                                                | 0.66/0.34                                                                                        | 0.52/0.48                                                                                        |
| Re <sup>2</sup> /Mo <sup>2</sup> | 0.46/0.54                                                                | 0.63/0.37                                                                                        | 0.50/0.50                                                                                        |
| Re <sup>3</sup> /Mo <sup>3</sup> | 0.59/0.41                                                                | 0.54/0.46                                                                                        | 0.43/0.57                                                                                        |
|                                  |                                                                          |                                                                                                  |                                                                                                  |
|                                  | $[\{\text{Re}_{3.30}\text{Mo}_{2.70}\text{S}_8\}(\text{etpy})_6]$<br>(4) | $[\{\text{Re}_4\text{Mo}_2\text{S}_8\}(\text{etpy})_6]$<br>(5)                                   | $[\{\text{Re}_3\text{Mo}_3\text{S}_8\}(\text{etpy})_6]$<br>(6)                                   |
| Re <sup>1</sup> /Mo <sup>1</sup> | 0.52/0.48                                                                | 0.70/0.30                                                                                        | 0.47/0.53                                                                                        |
| Re <sup>2</sup> /Mo <sup>2</sup> | 0.59/0.41                                                                | 0.76/0.24                                                                                        | 0.49/0.51                                                                                        |
|                                  |                                                                          |                                                                                                  |                                                                                                  |
|                                  | $[\{\text{Re}_{3.30}\text{Mo}_{2.70}\text{S}_8\}(\text{tbp})_6]$<br>(7)  | $[\{\text{Re}_4\text{Mo}_2\text{S}_8\}(\text{tbp})_6]$<br>$\cdot(\text{CH}_3\text{CN})_2$<br>(8) | $[\{\text{Re}_3\text{Mo}_3\text{S}_8\}(\text{tbp})_6]$<br>$\cdot(\text{CH}_3\text{CN})_2$<br>(9) |
| Re <sup>1</sup> /Mo <sup>1</sup> | 0.45/0.55                                                                | 0.68/0.32                                                                                        | 0.52/0.48                                                                                        |
| Re <sup>2</sup> /Mo <sup>2</sup> | 0.60/0.40                                                                | 0.66/0.34                                                                                        | 0.51/0.49                                                                                        |
| Re <sup>3</sup> /Mo <sup>3</sup> | 0.60/0.40                                                                | 0.65/0.35                                                                                        | 0.49/0.51                                                                                        |
| Re <sup>4</sup> /Mo <sup>4</sup> | –                                                                        | 0.66/0.34                                                                                        | 0.51/0.49                                                                                        |
| Re <sup>5</sup> /Mo <sup>5</sup> | –                                                                        | 0.57/0.43                                                                                        | 0.53/0.47                                                                                        |
| Re <sup>6</sup> /Mo <sup>6</sup> | –                                                                        | 0.60/0.40                                                                                        | 0.48/0.52                                                                                        |

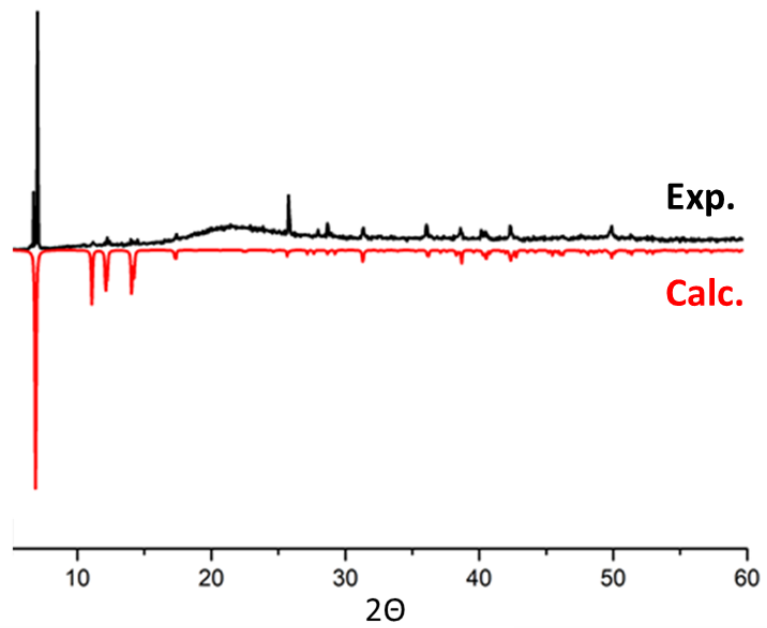

**Figure S4.** Powder XRD patterns for compound 4.

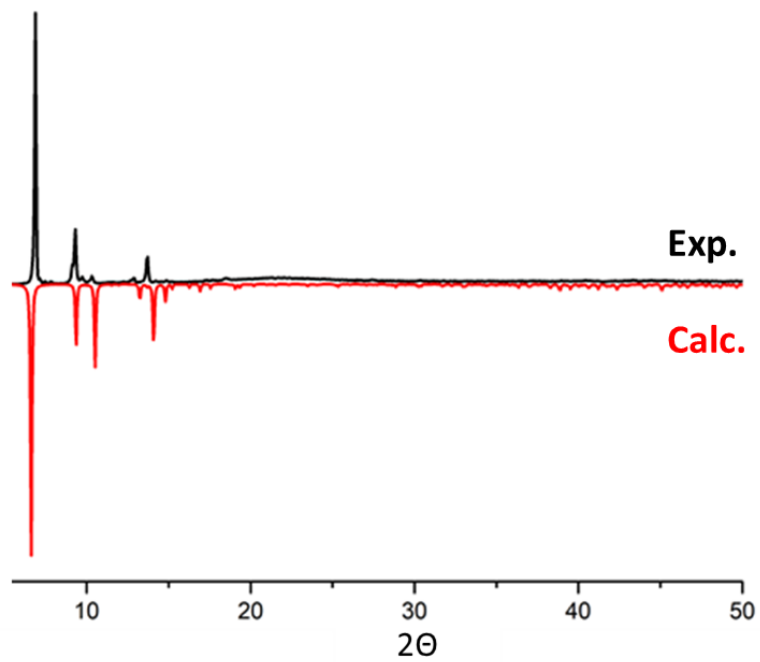

**Figure S5.** Powder XRD patterns for compound 7.



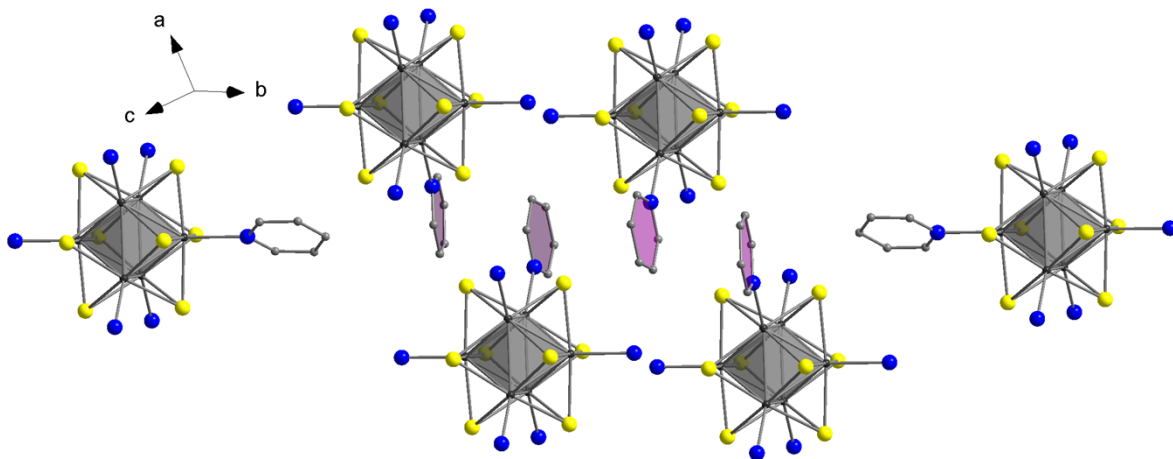

**Figure S6.** Formation of the isolated tetrameric fragments through the  $\pi$ - $\pi$  interactions in the structures of compounds **1–3**.

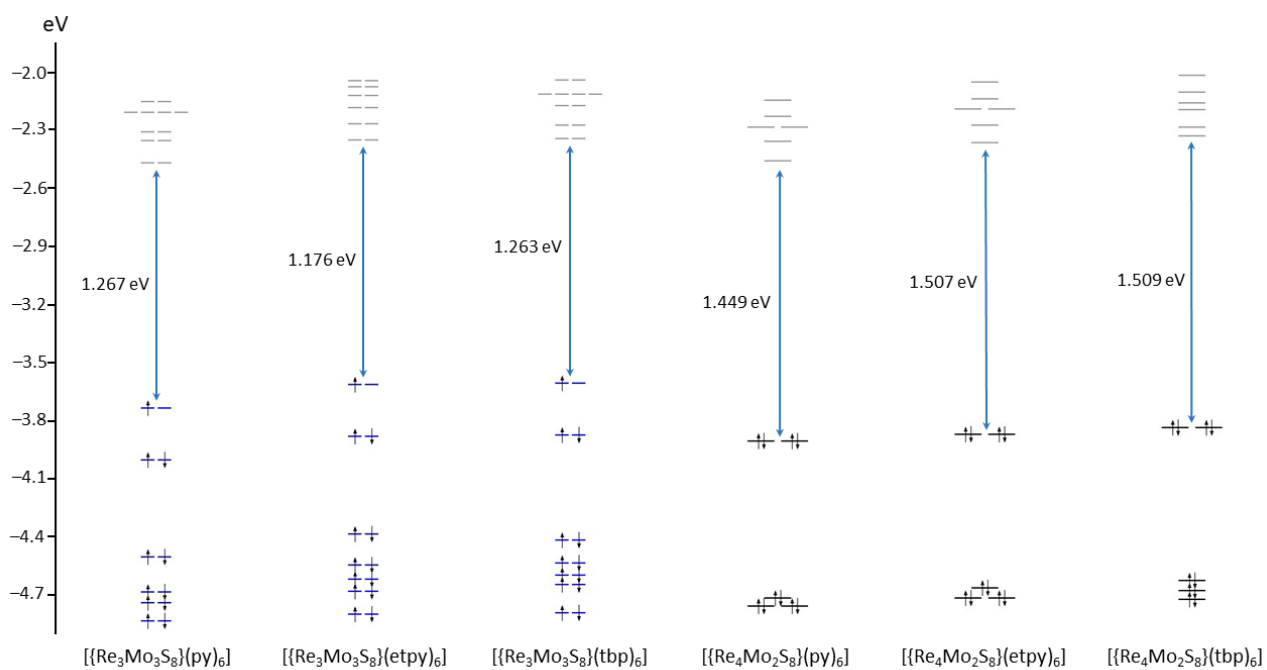

**Figure S7.** Calculated energy level diagrams and HOMO-LUMO gap values for *mer*- $[[\text{Re}_3\text{Mo}_3\text{S}_8]\text{L}_6]$  and *trans*- $[[\text{Re}_4\text{Mo}_2\text{S}_8]\text{L}_6]$  clusters (L = py, etpy, tbp)
